# Supplementary material for: Digital phenotyping of generalized anxiety disorder: using artificial intelligence to accurately predict symptom severity using wearable sensors in daily life
Source: PubMed Central journal article supplement (PMC9385727; doi:10.1038/s41398-022-02038-1), 2022-08-17
Supplement: 41398_2022_2038_MOESM1_ESM.pdf [file 41398_2022_2038_MOESM1_ESM.pdf]

Supplemental Table 1

*Means, standard deviations, and correlations among GAD Items*

| Variable           | <i>M</i> | <i>SD</i> | 1    | 2    | 3    | 4    | 5    | 6    | 7   | 8   | 9    | 10  | 11  | 12  | 13  | 14  | 15  | 16  | 17  | 18  | 19  |
|--------------------|----------|-----------|------|------|------|------|------|------|-----|-----|------|-----|-----|-----|-----|-----|-----|-----|-----|-----|-----|
| 1. Anx>1Mo         | 0.14     | 0.35      |      |      |      |      |      |      |     |     |      |     |     |     |     |     |     |     |     |     |     |
| 2. Anx>6Mo         | 0.03     | 0.17      | .43  |      |      |      |      |      |     |     |      |     |     |     |     |     |     |     |     |     |     |
| 3. Anx Dur         | 0.52     | 1.81      | .70  | .74  |      |      |      |      |     |     |      |     |     |     |     |     |     |     |     |     |     |
| 4. Anx Freq        | 0.38     | 1.04      | .90  | .51  | .73  |      |      |      |     |     |      |     |     |     |     |     |     |     |     |     |     |
| 5. Anx Hours       | 0.24     | 0.73      | .80  | .55  | .74  | .89  |      |      |     |     |      |     |     |     |     |     |     |     |     |     |     |
| 6. GAD Dur         | 0.11     | 0.58      | -.08 | -.03 | -.05 | -.07 | -.06 |      |     |     |      |     |     |     |     |     |     |     |     |     |     |
| 7. GAD Freq        | 0.12     | 0.59      | -.09 | -.04 | -.06 | -.08 | -.07 | .80  |     |     |      |     |     |     |     |     |     |     |     |     |     |
| 8. GAD Hours       | 0.08     | 0.47      | -.07 | -.03 | -.05 | -.06 | -.05 | .75  | .92 |     |      |     |     |     |     |     |     |     |     |     |     |
| 9. Mult Worries    | 0.05     | 0.21      | .38  | .39  | .30  | .38  | .33  | .28  | .30 | .23 |      |     |     |     |     |     |     |     |     |     |     |
| 10. Excess Worries | 0.03     | 0.16      | .34  | .11  | .29  | .33  | .37  | .01  | .05 | .07 | -.04 |     |     |     |     |     |     |     |     |     |     |
| 11. Control        | 0.25     | 0.84      | .56  | .24  | .45  | .63  | .70  | .17  | .22 | .30 | -.06 | .57 |     |     |     |     |     |     |     |     |     |
| 12. Out of Mind    | 0.23     | 0.78      | .59  | .26  | .49  | .65  | .73  | .09  | .17 | .23 | -.06 | .59 | .96 |     |     |     |     |     |     |     |     |
| 13. Restless       | 0.07     | 0.26      | .51  | .21  | .42  | .56  | .61  | .15  | .24 | .32 | -.06 | .59 | .88 | .86 |     |     |     |     |     |     |     |
| 14. Keyed-up       | 0.06     | 0.24      | .53  | .23  | .49  | .61  | .64  | .01  | .08 | .12 | -.06 | .45 | .79 | .82 | .73 |     |     |     |     |     |     |
| 15. Tired          | 0.06     | 0.23      | .51  | .24  | .43  | .59  | .64  | .13  | .15 | .20 | -.05 | .27 | .78 | .77 | .75 | .49 |     |     |     |     |     |
| 16. Irritable      | 0.08     | 0.27      | .54  | .20  | .45  | .58  | .65  | .15  | .23 | .31 | -.06 | .58 | .94 | .93 | .92 | .83 | .73 |     |     |     |     |
| 17. Trouble Sleep  | 0.05     | 0.21      | .48  | .28  | .48  | .50  | .65  | -.01 | .08 | .08 | -.05 | .30 | .74 | .75 | .64 | .71 | .65 | .69 |     |     |     |
| 18. Keeping Mind   | 0.08     | 0.27      | .54  | .20  | .45  | .58  | .67  | .15  | .23 | .31 | -.06 | .49 | .90 | .93 | .86 | .83 | .73 | .95 | .69 |     |     |
| 19. Tense          | 0.04     | 0.19      | .37  | .20  | .45  | .42  | .53  | .17  | .20 | .26 | -.04 | .21 | .67 | .68 | .56 | .53 | .72 | .62 | .72 | .69 |     |
| 20. Interference   | 0.01     | 0.11      | .16  | -.02 | .21  | .10  | .21  | .29  | .16 | .28 | -.02 | .20 | .35 | .29 | .38 | .27 | .28 | .37 | .32 | .37 | .35 |

*Note.* *M* and *SD* are used to represent mean and standard deviation, respectively.
